# Supplementary material for: Widespread and Persistent Ozone Pollution in Eastern China
Source: Copernicus journal article supplement (doi:10.5194/acp-2016-864), 2016-10-14
Supplement: Supplementary file 1 [file acp-2016-864-supplement.pdf]

# Widespread and Persistent Ozone Pollution in Eastern China

Guohui Li<sup>1\*</sup>, Naifang Bei<sup>2</sup>, Junji Cao<sup>1\*</sup>, Jiarui Wu<sup>1</sup>, Xin Long<sup>1</sup>, Tian Feng<sup>1, 2</sup>, Wenting Dai<sup>1</sup>, Suixin Liu<sup>1</sup>, Qiang Zhang<sup>3</sup>, and Xuexi Tie<sup>1</sup>

<sup>1</sup>Key Lab of Aerosol Chemistry and Physics, SKLLQG, Institute of Earth Environment, Chinese Academy of Sciences, Xi'an, China

<sup>2</sup>School of Human Settlements and Civil Engineering, Xi'an Jiaotong University, Xi'an, Shaanxi, China

<sup>3</sup>Department of Environmental Sciences and Engineering, Tsinghua University, Beijing, China

\*Correspondence to: Guohui Li ([ligh@ieecas.cn](mailto:ligh@ieecas.cn)) and Junji Cao ([jjcao@ieecas.cn](mailto:jjcao@ieecas.cn))

### 13 **Supplementary Information Section**

14       The supplementary information (SI) provides description about the NO<sub>2</sub> simulations.

15

16

17

18

## Supplementary Figure Captions

- SI-Figure 1 Defined four sections in Eastern China. 1) Northeast China (NEC): Heilongjiang, Jilin, Liaoning, and the east part of Inner Mongolia, 2) North China Plain and surrounding areas (NCPs): Beijing, Tianjin, Hebei, Shandong, Henan, Shanxi, and the north part of Jiangsu and Anhui, 3) YRD and surrounding areas (YRDs): the south part of Jiangsu and Anhui, Shanghai, Zhejiang, and Hubei, and 4) PRD and surrounding areas (PRDs): Fujian, Jiangxi, Hunan, Guangxi, and Guangdong.
- SI-Figure 2 Pattern comparison of simulated vs. observed near-surface NO<sub>2</sub> at 08:00 BJT from 22 to 27 May 2015. Colored circles: NO<sub>2</sub> observations; color contour: NO<sub>2</sub> simulations; black arrows: simulated surface winds.
- SI-Figure 3 Comparison of measured (black dots) and predicted (blue line) diurnal profiles of near-surface NO<sub>2</sub> averaged over all ambient monitoring stations in provinces of Eastern China from 22 to 28 May 2015.

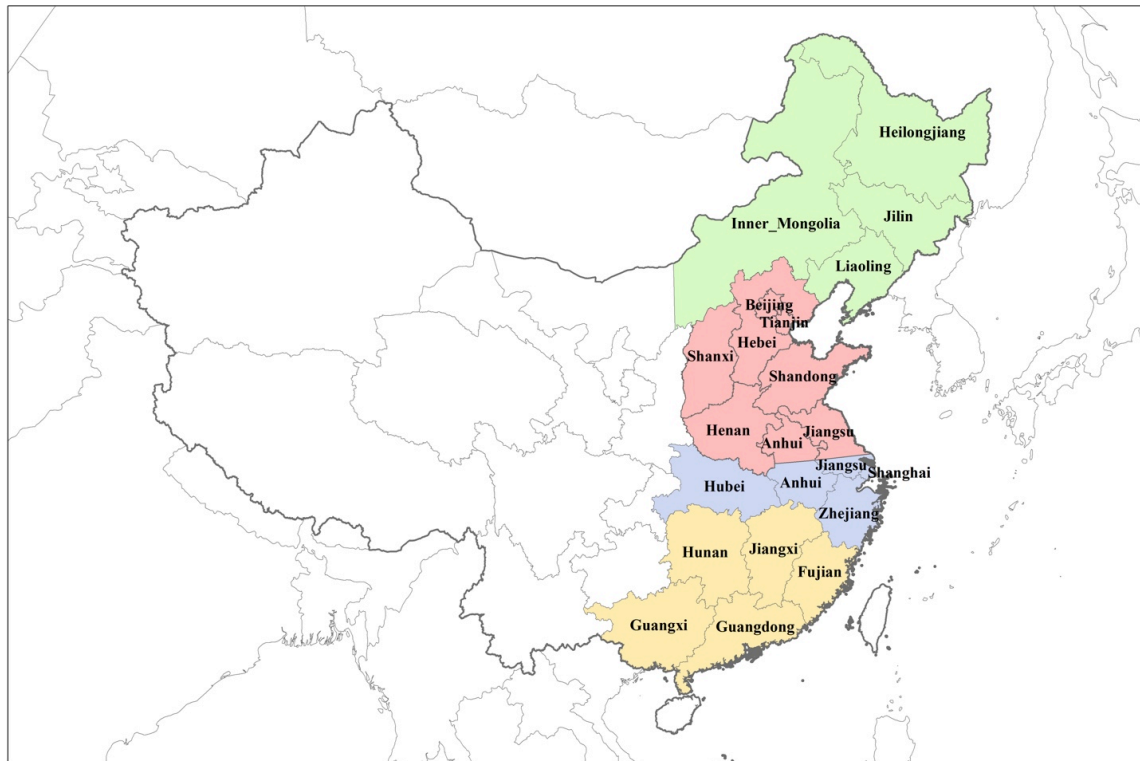

SI-Figure 1 Defined four sections in Eastern China. 1) Northeast China (NEC): Heilongjiang, Jilin, Liaoning, and the east part of Inner Mongolia; 2) North China Plain and surrounding areas (NCPs): Beijing, Tianjin, Hebei, Shandong, Henan, Shanxi, and the north part of Jiangsu and Anhui; 3) YRD and surrounding areas (YRDs): the south part of Jiangsu and Anhui, Shanghai, Zhejiang, and Hubei; and 4) PRD and surrounding areas (PRDs): Fujian, Jiangxi, Hunan, Guangxi, and Guangdong.

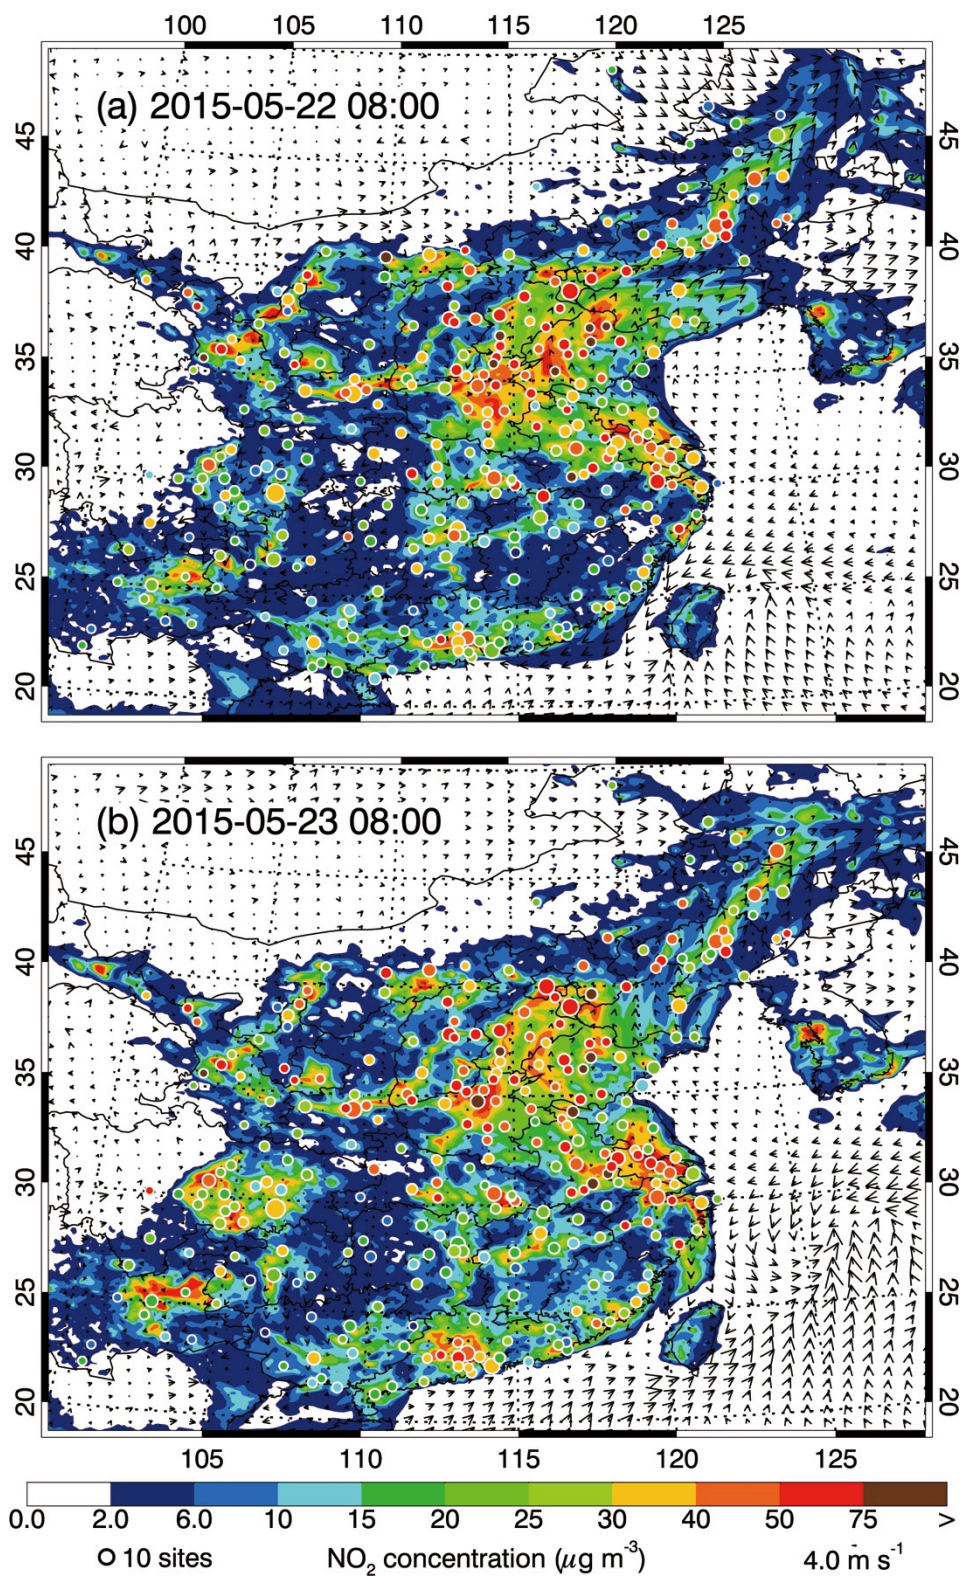

SI-Figure 2 Pattern comparison of simulated vs. observed near-surface NO<sub>2</sub> at 08:00 BJT from 22 to 27 May 2015. Colored circles: NO<sub>2</sub> observations; color contour: NO<sub>2</sub> simulations; black arrows: simulated surface winds.



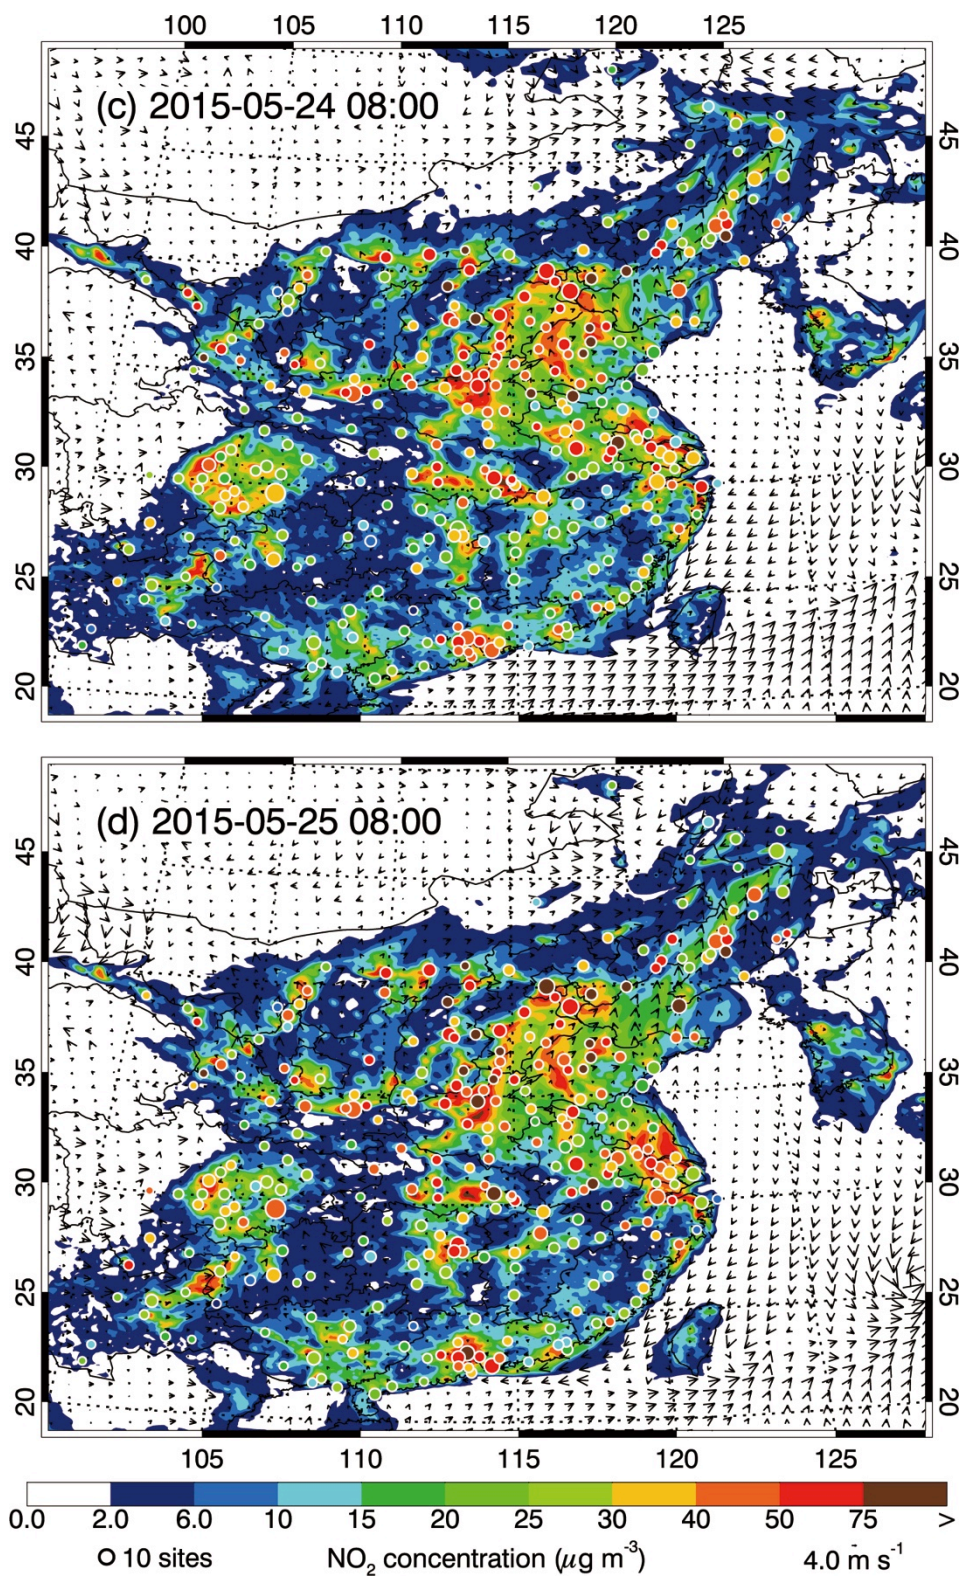

SI-Figure 2 Continued.



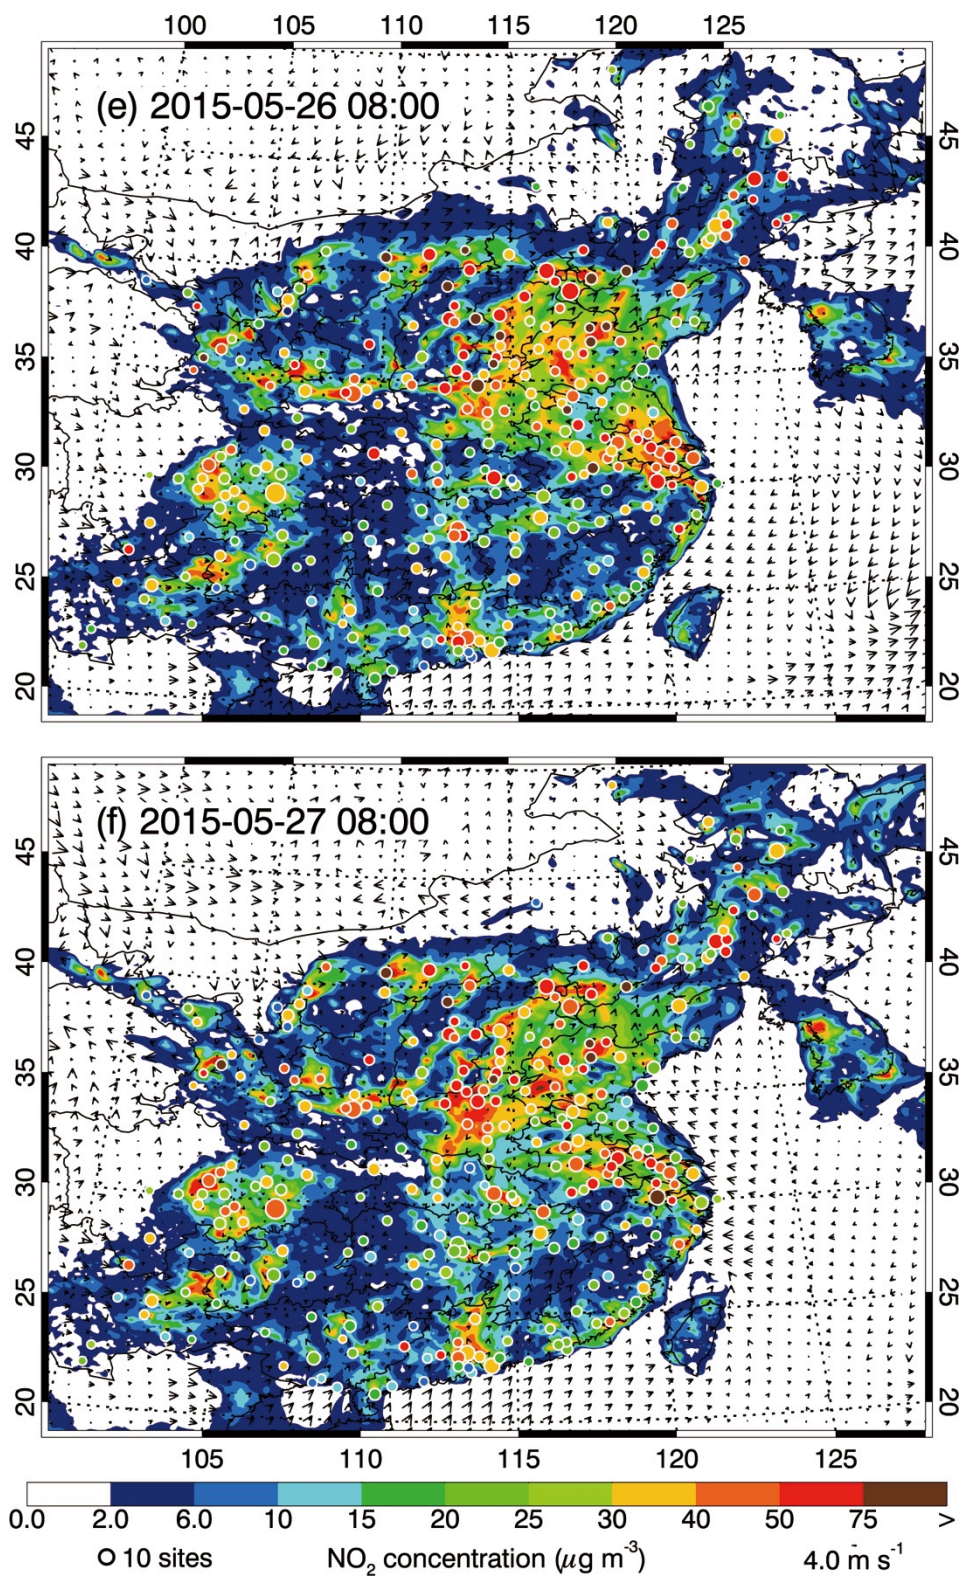

SI-Figure 2 Continued.

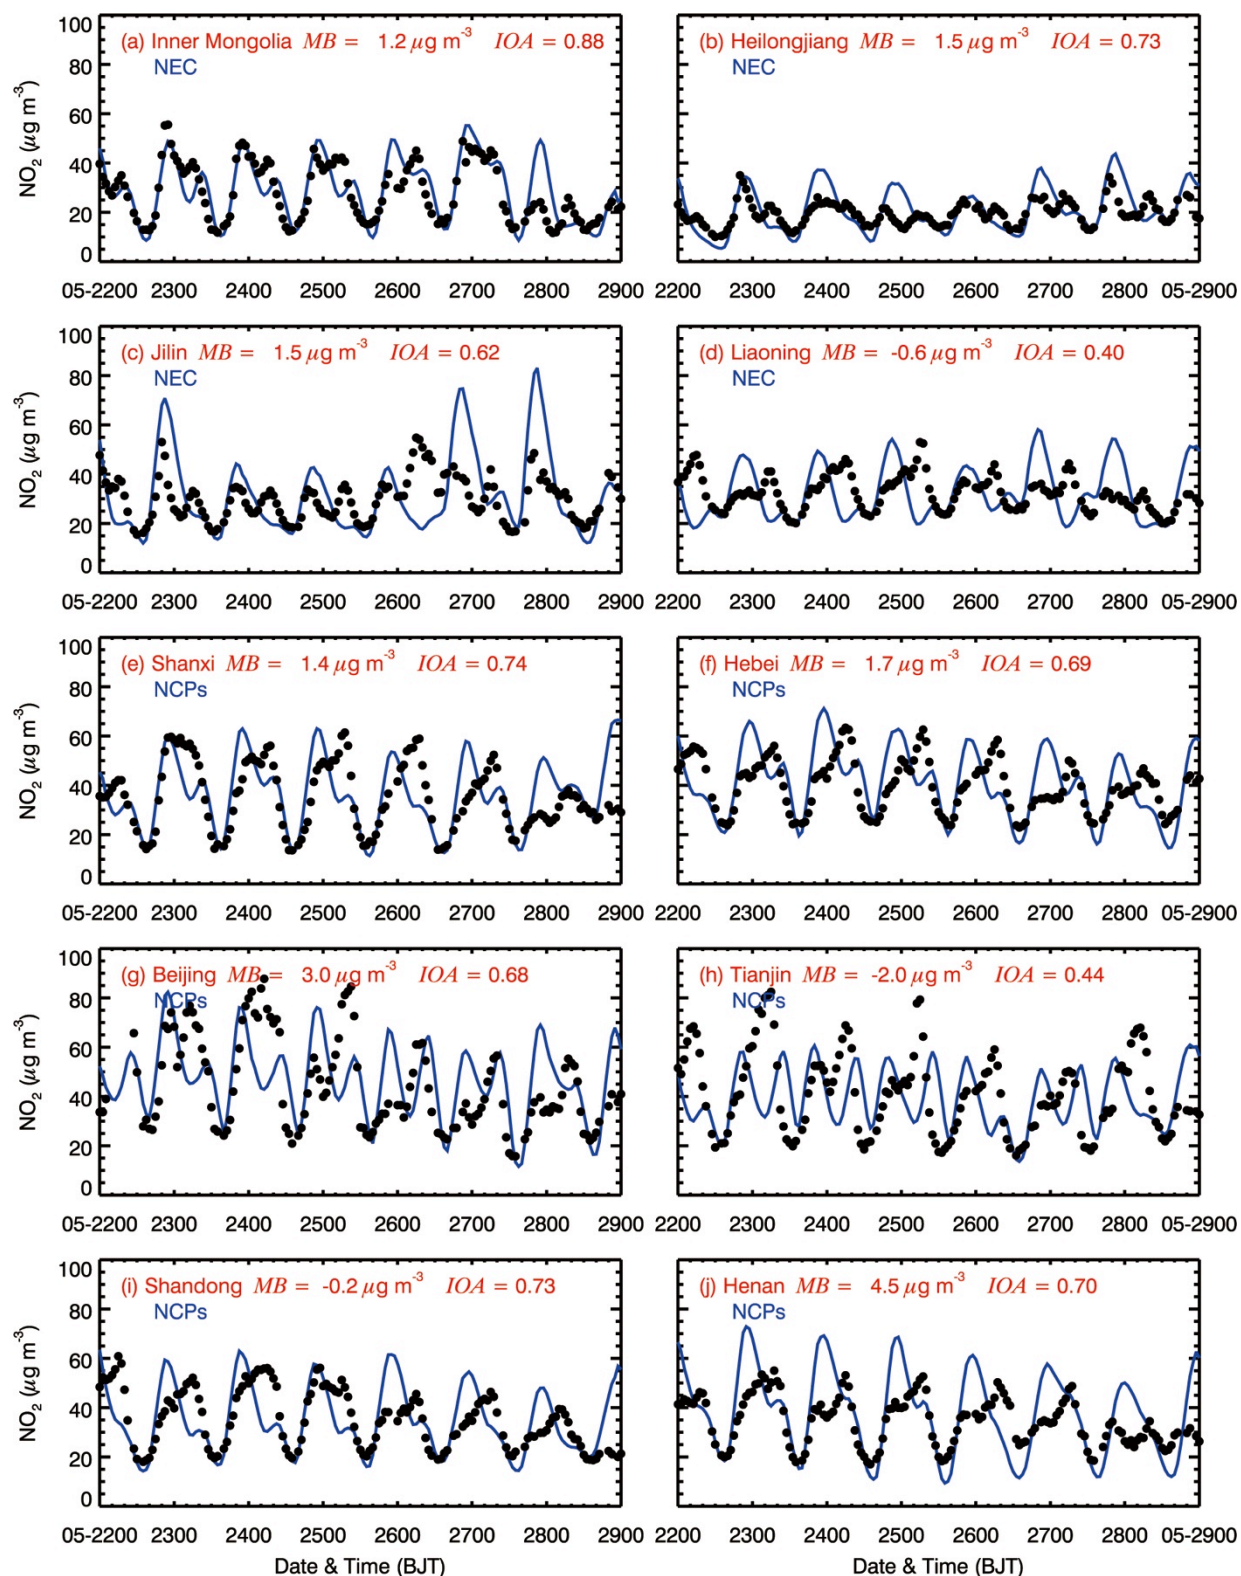

SI-Figure 3 Comparison of measured (black dots) and predicted (blue line) diurnal profiles of near-surface  $\text{NO}_2$  averaged over all ambient monitoring stations in provinces of Eastern China from 22 to 28 May 2015.



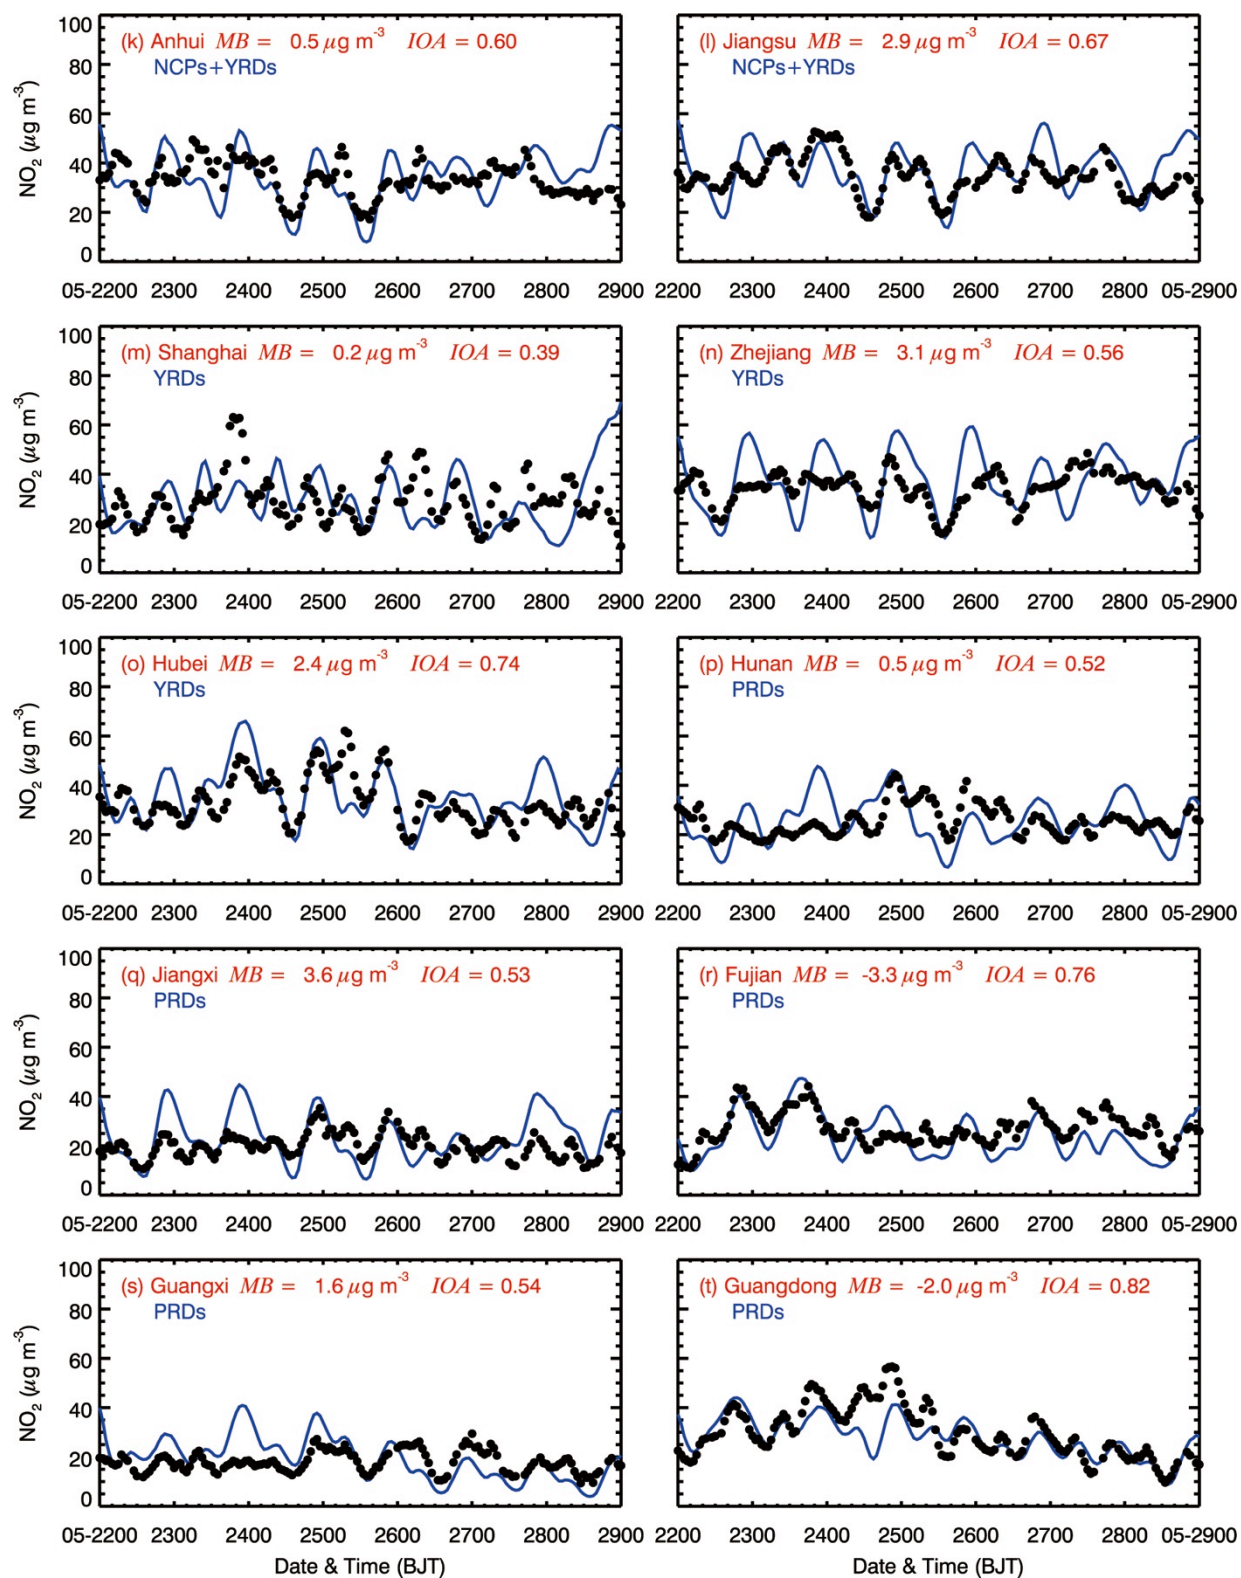

SI-Figure 3 Continued.
